# Supplementary material
Source: bioRxiv or medRxiv preprint supplement (https://medrxiv.org/highwire/filestream/83769/field_highwire_adjunct_files/0/2020.05.31.20118752-1.pdf)
Supplement: Supplementary file [file 2020.05.31.20118752-1.pdf]

## Supplement

### Data source

LE: LE data came from: <http://hdl.handle.net/10622/LKYT53>, IISH Dataverse, V1, and UN Population Division (2019).

IMR, U5MR: Both data came from World Bank – World Development Indicators. Estimates developed by the UN Inter-agency Group for Child Mortality Estimation (UNICEF, WHO, World Bank, UN DESA Population Division)

PM<sub>2.5</sub>: The data source is atmospheric composition analysis group [http://fizz.phys.dal.ca/~atmos/martin/?page\\_id=140](http://fizz.phys.dal.ca/~atmos/martin/?page_id=140).

CO<sub>2</sub>: Data of CO<sub>2</sub> came from OWID based on the Global Carbon Project, Carbon Dioxide Information Analysis Centre (CDIAC), Gapminder and UN population estimates.

PGDP: PGDP data were from World Bank national accounts data, and OECD National Accounts data files.

T2M and QV2M: The data source is <https://power.larc.nasa.gov/data-access-viewer/>

**Table S1 Summary of PC in four income country groups during 2000-2016**

|                     | Mean   | Sd     | Min  | Median | Max    |
|---------------------|--------|--------|------|--------|--------|
| High income         | 2.03   | 1.19   | 0.41 | 1.79   | 7.52   |
| Upper-middle income | 3.84   | 2.57   | 0.42 | 3.40   | 19.76  |
| Lower-middle income | 28.72  | 42.16  | 0.59 | 10.21  | 216.35 |
| Low income          | 188.37 | 163.03 | 5.83 | 144.90 | 738.51 |

**Notes:** Sd: standard deviation, Min: minimum, Max: maximum; Range: difference between maximum and minimum.

Thresholds of four income groups—high, upper-middle, lower-middle, and low-income economies are \$12,235, \$3955 and \$1,005 of GNI per capita of year 2017-2018 according to the World Bank economies subgroup division standard[29]. We used the GDP per capita of each country in the year of 2016 to divide the income group.

**Table S<sub>2</sub> The Pearson correlation matrix of PC, LPGDP, health and environmental indicators during 2000-2016**

| Variables         | PC   | LE      | IMR     | U5MR    | PM <sub>2.5</sub> | CO <sub>2</sub> | LPGDP   | T2M     | QV2M    |
|-------------------|------|---------|---------|---------|-------------------|-----------------|---------|---------|---------|
| PC                | 1.00 | -       | 0.65*** | 0.66*** | 0.40***           | -               | -       | 0.24*** | 0.14*** |
|                   |      | 0.57*** |         |         |                   | 0.31***         | 0.59*** |         |         |
| LE                |      | 1.00    | -       | -       | -                 | 0.47***         | 0.78*** | -       | -       |
|                   |      |         | 0.92*** | 0.92*** | 0.19***           |                 |         | 0.39*** | 0.25*** |
| IMR               |      |         | 1.00    | 0.99*** | 0.28***           | -               | -       | 0.43*** | 0.26*** |
|                   |      |         |         |         |                   | 0.73***         | 0.79*** |         |         |
| U5MR              |      |         |         | 1.00    | 0.32***           | -               | -       | 0.41*** | 0.24*** |
|                   |      |         |         |         |                   | 0.45***         | 0.76*** |         |         |
| PM <sub>2.5</sub> |      |         |         |         | 1.00              | 0.17***         | -       | 0.22*** | -       |
|                   |      |         |         |         |                   |                 | 0.21*** |         | 0.13*** |
| CO <sub>2</sub>   |      |         |         |         |                   | 1.00            | 0.67*** | -       | -       |
|                   |      |         |         |         |                   |                 |         | 0.20*** | 0.29*** |
| LPGDP             |      |         |         |         |                   |                 | 1.00    | -       | -       |
|                   |      |         |         |         |                   |                 |         | 0.42*** | 0.32*** |
| T2M               |      |         |         |         |                   |                 |         | 1.00    | 0.75*** |
| QV2M              |      |         |         |         |                   |                 |         |         | 1.00    |

**Note:** \*\*\*P<0.001. PC: PM<sub>2.5</sub> concentration per unit per capita CO<sub>2</sub> emission; LE: life expectancy at birth; IMR: Infant-mortality rate; U5MR: Under-five mortality rate; PM<sub>2.5</sub>: fine particulate matter with aero dynamic diameter ≤ 2.5um; CO<sub>2</sub>: carbon dioxide emission per capita; LPGDP: logarithm of GDP per capita; T2M: Temperatures at 2 meters; QV2M: Specific Humidity at 2 Meters.

**Table S<sub>3</sub> The adjusted R<sup>2</sup> of different GAMM models**

| Models         | LE(years) | IMR(‰) | U5MR(‰) |
|----------------|-----------|--------|---------|
| <b>Model 1</b> | 0.320     | 0.417  | 0.435   |
| <b>Model 2</b> | 0.035     | 0.078  | 0.105   |
| <b>Model 3</b> | 0.221     | 0.224  | 0.198   |
| <b>Model 4</b> | 0.580     | 0.636  | 0.613   |
| <b>Model 5</b> | 0.612     | 0.586  | 0.595   |
| <b>Model 6</b> | 0.540     | 0.619  | 0.624   |
| <b>Model 7</b> | 0.616     | 0.635  | 0.627   |
| n              | 2466      | 2448   | 2409    |

**Note:** The independent variables in model 1~7 were: Model1: PC; Model2: PM<sub>2.5</sub>; Model3: CO<sub>2</sub>; Model4: PGDP; Model5: PC+PGDP +PM<sub>2.5</sub> +CO<sub>2</sub>; Model6: PC+PGDP+T2M+QV2M; Model7: PC+PGDP+PM<sub>2.5</sub>+CO<sub>2</sub> +T2M+QV2M respectively. Degrees of freedom (df) were 4 in the smoothing function realized by cubic spline. LE: life expectancy at birth, IMR: Infant-mortality rate, U5MR: Under-five mortality rate, PC: PM<sub>2.5</sub> concentration per unit per capita CO<sub>2</sub> emission, PGDP: GDP per capita, T2M: Temperatures at 2 meters, QV2M: Specific Humidity at 2 Meters.

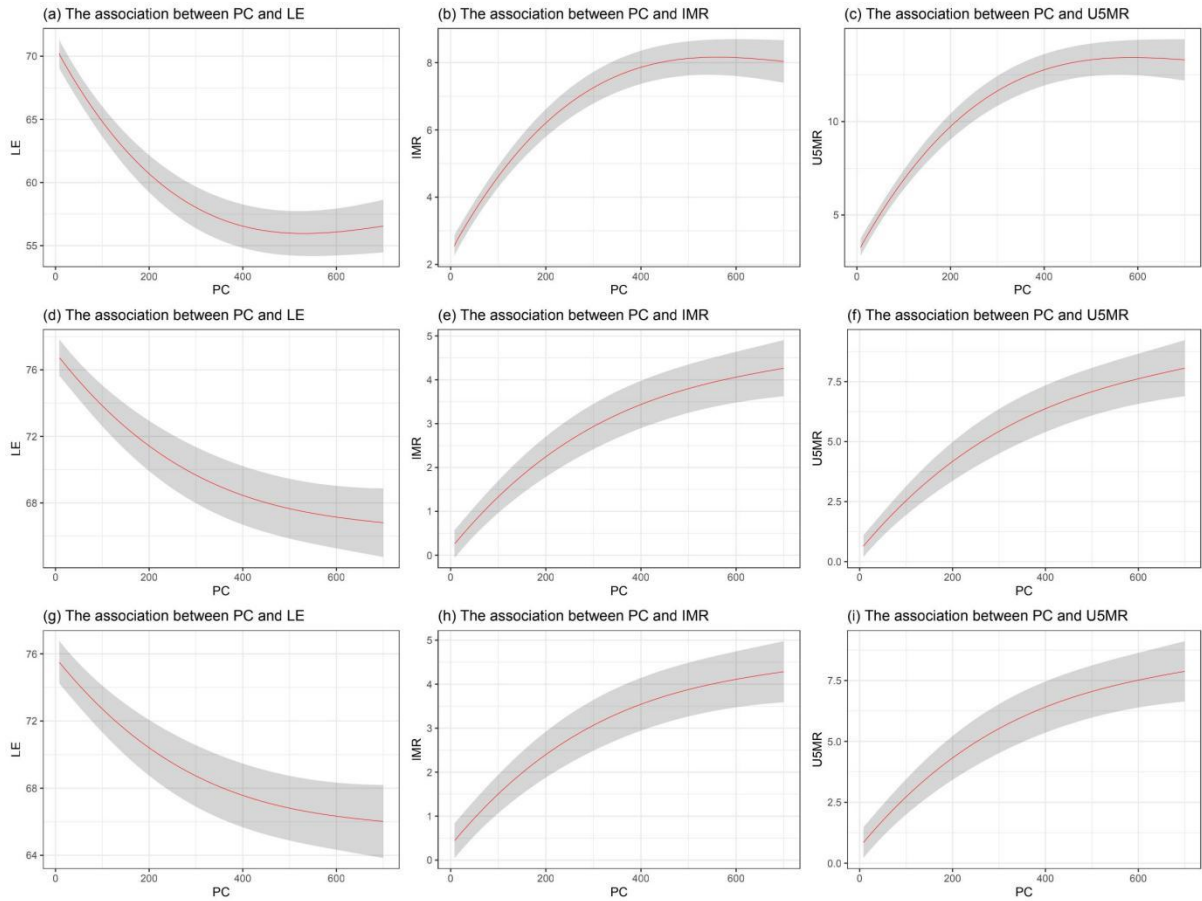

**Figure S1. The modelled associations of PC with LE, IMR, U5MR, by GAMM**

**Note:** Black shadow meant 95% confidence interval (CI). LE: life expectancy at birth, IMR: Infant-mortality rate, U5MR: Under-five mortality rate, PC: PM<sub>2.5</sub> concentration per unit per capita CO<sub>2</sub> emission, LPGDP: logarithm of GDP per capita. The covariates of GAMM were: PC( for a1-a3-c); PC+ PGDP (for b1-b3d-f);PC+PGDP+T2M+QV2M (for c1-c3g-i);
